# Supplementary material for: Dissecting Xuesaitong's mechanisms on preventing stroke based on the microarray and connectivity map
Source: Royal Society of Chemistry journal article supplement (doi:10.1039/c5mb00379b), 2015-08-25
Supplement: c5mb00379b1.xlsx [file c5mb00379b1.xlsx]

## Sheet: Sheet1
down regulated by XST	up regulated by XST
6696	8718
7046	2161
2	3694
5156	1958
3075	664
6387	10814
5627	4852
7035	4045
3606	84867
3588	7301
58191	5799
7132	57338
929	57731
7450	183
4055	3164
8742	213
7097	1917
3663	5126
1441	3043
7852	6506
7292	324
958	627
7099	3726
1234	116369
6348	6833
841	64221
655	56955
2162	3350
7040	6098
7133	3356
6352	6261
2690	4223
2833	1128
6356	23095
1278	6403
3479	8988
5328	197
1535	6532
1536	2837
1282	5320
1293	1586
4950
50848
284217
3383
4313
948
5175
1284
3685
653361
5660
2876
347
3958
3921
5034
199
7077
3936
7076
54209
8673
302
301
813
64805
79001
10019
2167
4321
3315
3162
4056
217
7498
19
4023
871
6241
5167
4627
6916
4192
831
4288
2004
10801
241
285
2313
4000
4015
4507
7351
467
2028
7980
8406
5742
637
3486
3783
7374
3304
6573
59
800
54751
839
10544
7139
154
1909
5583
133
2624
5972
3257
6280
6279
4053
1636
7298
5734
2952
239
55388
1787
2984
9536
2006
54821
7200
7291
3077
10461
4316
4846
4548
187
6336
1029
5444
3082
5468
338
4320
8048
580
5978
1544
335
4803
3567
284
1030
7124
3990
727
462
9971
5319
8654
5104
6710
1215
3957
5617
7048
26039
